# Supplementary material for: Capsule Endoscopy versus Colonoscopy for the Detection of Polyps and Cancer
Source: Atypon-hosted journal article supplement (doi:10.1056/nejmoa0806347), 2009-07-15
Supplement: nejm_van_gossum_264sa1.pdf [file nejm_van_gossum_264sa1.pdf]

## Supplementary Appendix

This appendix has been provided by the authors to give readers additional information about their work.

Supplement to: Van Gossum A, Munoz-Navas M, Fernandez-Urien I, et al. Capsule endoscopy versus colonoscopy for the detection of polyps and cancer. *N Engl J Med* 2009;361:264-70.

**Web-only Appendix. Figure 1. PillCam<sup>®</sup> COLON Preparation and Procedure Regimen.**

| <b>Time</b>                            | <b>Action</b>                                                                                                                                                      |
|----------------------------------------|--------------------------------------------------------------------------------------------------------------------------------------------------------------------|
| <b>Day -1</b>                          |                                                                                                                                                                    |
| All day                                | Clear liquids only (no breakfast)                                                                                                                                  |
| 18:00 - 21:00                          | 3 Liters oral preparation of polyethylene glycol solution (Colopeg <sup>®</sup> or Kleanprep <sup>®</sup> solution), 1 cup (200-250mL) every 10-15 minutes         |
| <b>Exam Day<sup>(1)</sup></b>          |                                                                                                                                                                    |
| 06:00 – 07:00                          | 1 Liter oral preparation of polyethylene glycol osmotic solution (Colopeg <sup>®</sup> or Kleanprep <sup>®</sup> solution ), 1 cup (200-250mL) every 10-15 minutes |
| 07:45                                  | 20mg (two tablets of 10mg) Domeperidone (Motilium <sup>®</sup> ) (with a cup of water)                                                                             |
| 08:00                                  | PillCam <sup>®</sup> COLON ingestion (with a cup of water)                                                                                                         |
| 10:00                                  | Boost #1 <sup>(2)</sup> : 45ml oral NaP (Fleet Phospho-Soda <sup>®</sup> ) + 1 Liter water                                                                         |
| 14:00                                  | Boost #2 : 30ml oral NaP (Fleet Phospho-Soda <sup>®</sup> ) + 1 Liter water                                                                                        |
| 15:00                                  | Optional energy drink, e.g., Red Bull <sup>®</sup>                                                                                                                 |
| 16:30                                  | 10mg Bisacodyl (Dulcolax <sup>®</sup> ) rectal suppository                                                                                                         |
| Post capsule excretion or next morning | Conventional optical colonoscopy                                                                                                                                   |

- (1) Colon preparation and procedure on day of PillCam<sup>®</sup> COLON examination was performed on-site. When PillCam<sup>®</sup> COLON was excreted early, the preparation regimen was discontinued and patient underwent conventional optical colonoscopy.
- (2) If the capsule *has not* left the stomach, its location was checked with RAPID Access Real Time Tablet PC (by Given Imaging) until gastric passage was confirmed. Once the capsule exited the stomach, Boost #1 was administered. Boost #2 was administered three hours after Boost #1. A rectal suppository was administered at approximately five hours after Boost #1. No boosts or suppository was provided if the PillCam<sup>®</sup> COLON remained in the stomach after 16:00.

**Web-only Appendix. Figure 2. Colon cleansing grading scale used to objectively describe the preparation of the colon at the time of capsule endoscopy.**

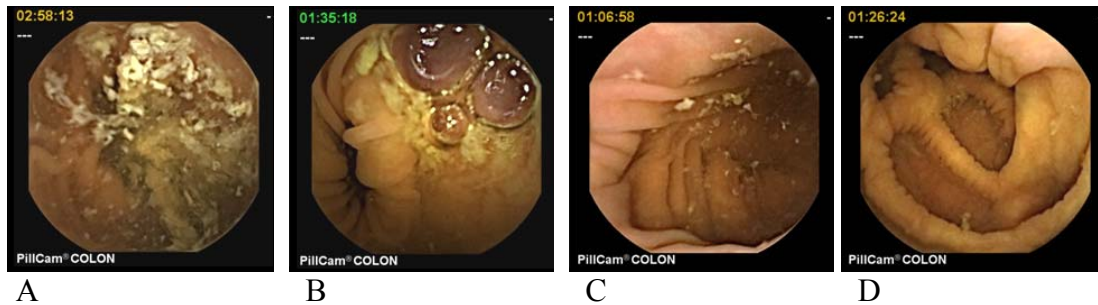

A: Large amount of fecal residue.

B: Enough feces or dark fluid present to preclude a completely reliable examination.

C: Small amount of feces or dark fluid, but not enough to interfere with examination.

D: No more than small bits of adherent feces.

**Web-only Appendix. Figure 3. Polyp prevalence by shape (n=320).**

| <i>Polyp Type</i> | <i>According to OC</i> |                 |              |               | <i>According to PCCE</i> |                 |               |               |
|-------------------|------------------------|-----------------|--------------|---------------|--------------------------|-----------------|---------------|---------------|
|                   | <i>Any Polyp</i>       | <i>&lt;6 mm</i> | <i>6-9mm</i> | <i>≥10 mm</i> | <i>Any Polyp</i>         | <i>&lt;6 mm</i> | <i>6-9 mm</i> | <i>≥10 mm</i> |
| Pedunculated      | 54<br>(8%)             | 13<br>(2%)      | 6<br>(10%)   | 35<br>(47%)   | 52<br>(10%)              | 29<br>(7%)      | 9<br>(20%)    | 14<br>(34%)   |
| Sessile           | 478<br>(72%)           | 401<br>(76%)    | 49<br>(80%)  | 28<br>(38%)   | 365<br>(71%)             | 318<br>(74%)    | 30<br>(68%)   | 17<br>(41%)   |
| Flat              | 108<br>(16%)           | 98<br>(19%)     | 6<br>(10%)   | 4<br>(5%)     | 77<br>(15%)              | 73<br>(17%)     | 3<br>(7%)     | 1<br>(4%)     |
| Depressed         | 5<br>(1%)              | 0<br>(0%)       | 0<br>(0%)    | 5<br>(7%)     | 3<br>(1%)                | 0<br>(0%)       | 0<br>(0%)     | 3<br>(7%)     |
| Unknown           | 17<br>(3%)             | 15<br>(3%)      | 0<br>(0%)    | 2<br>(3%)     | 15<br>(3%)               | 7<br>(2%)       | 2<br>(5%)     | 6<br>(14%)    |
| Total             | 662                    | 527             | 61           | 74            | 512                      | 427             | 44            | 41            |
